# Supplementary material for: Dynamic fluorescent imaging with the activatable probe, γ-glutamyl hydroxymethyl rhodamine green in the detection of peritoneal cancer metastases: Overcoming the problem of dilution when using a sprayable optical probe
Source: PubMed Central journal article supplement (PMC5239463; doi:10.18632/oncotarget.9898), 2016-06-07
Supplement: oncotarget-07-51124-s001.pdf [file oncotarget-07-51124-s001.pdf]

## Dynamic fluorescent imaging with the activatable probe, $\gamma$ -glutamyl hydroxymethyl rhodamine green in the detection of peritoneal cancer metastases: Overcoming the problem of dilution when using a sprayable optical probe

### Supplementary Materials

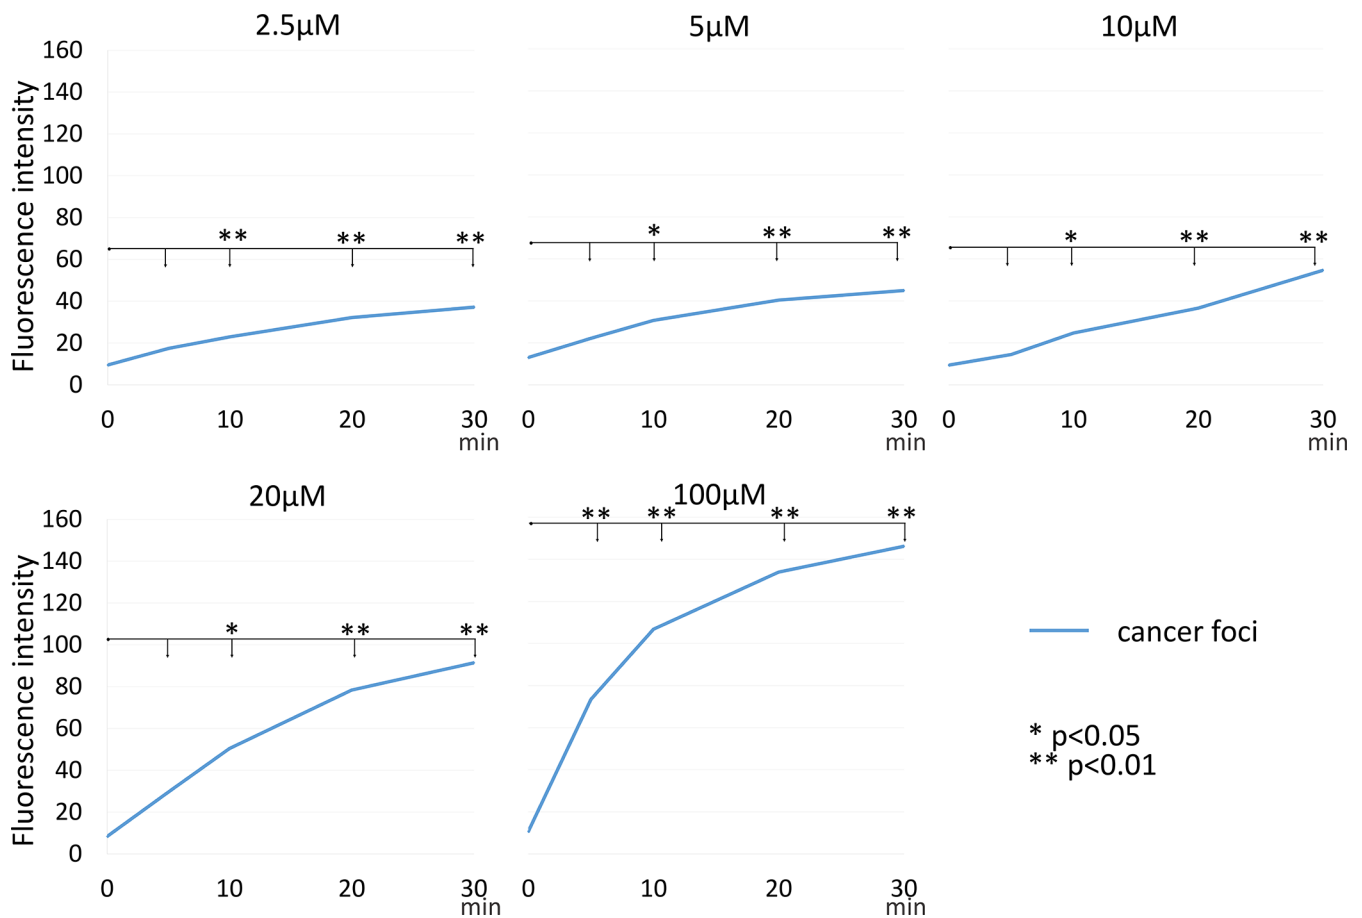

**Supplementary Figure S1: Time fluorescence intensity curve of the cancer foci on unprocessed images.** Difference at each time point compared to starting value was examined.

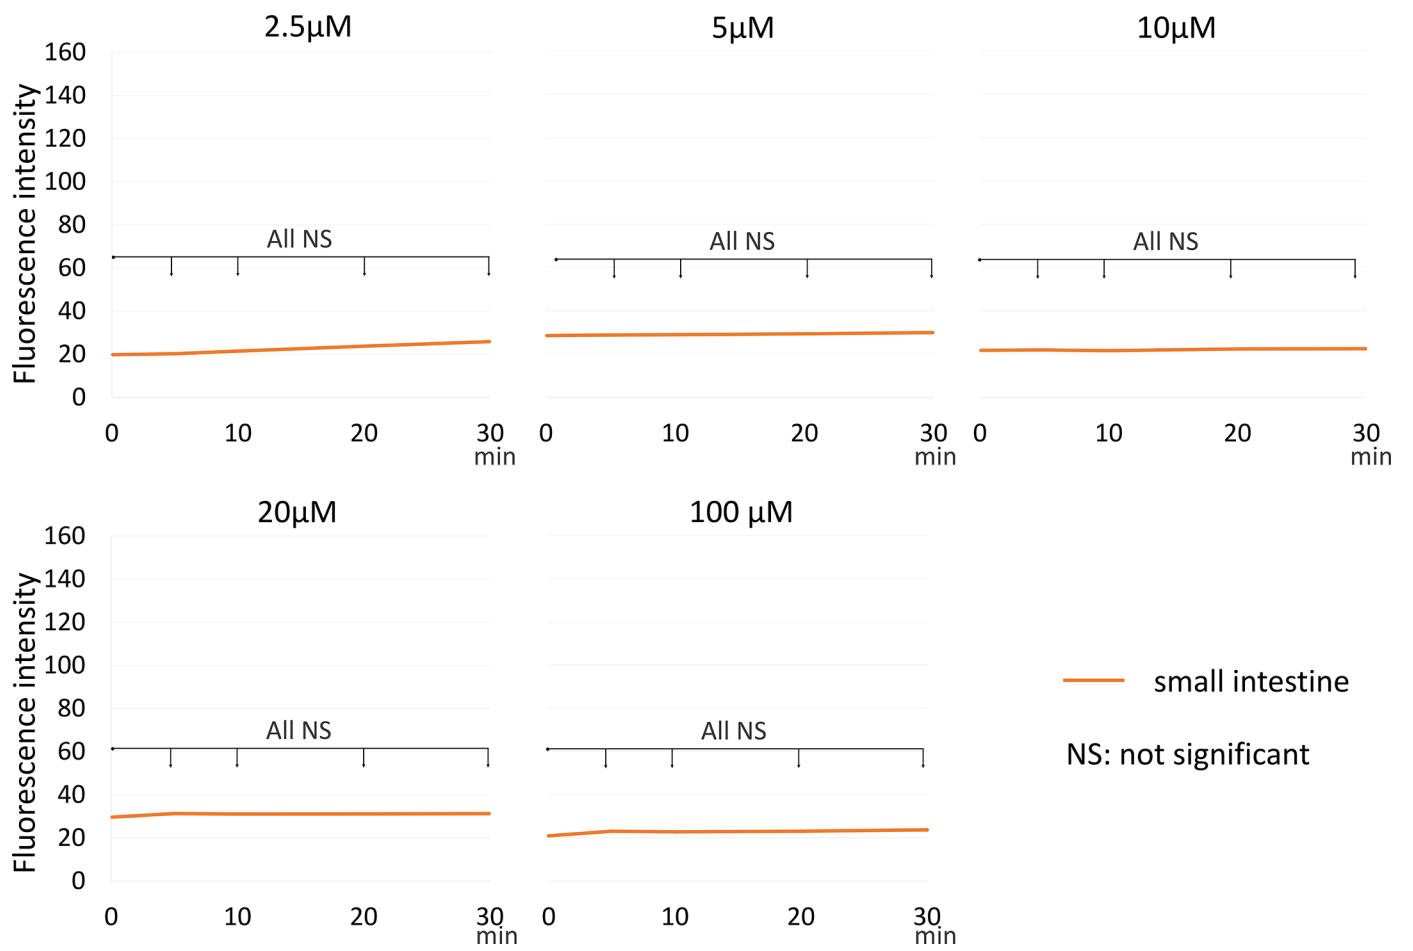

**Supplementary Figure S2: Time fluorescence intensity curve of small intestine on unprocessed images.** Difference at each time point compared to starting value was examined.

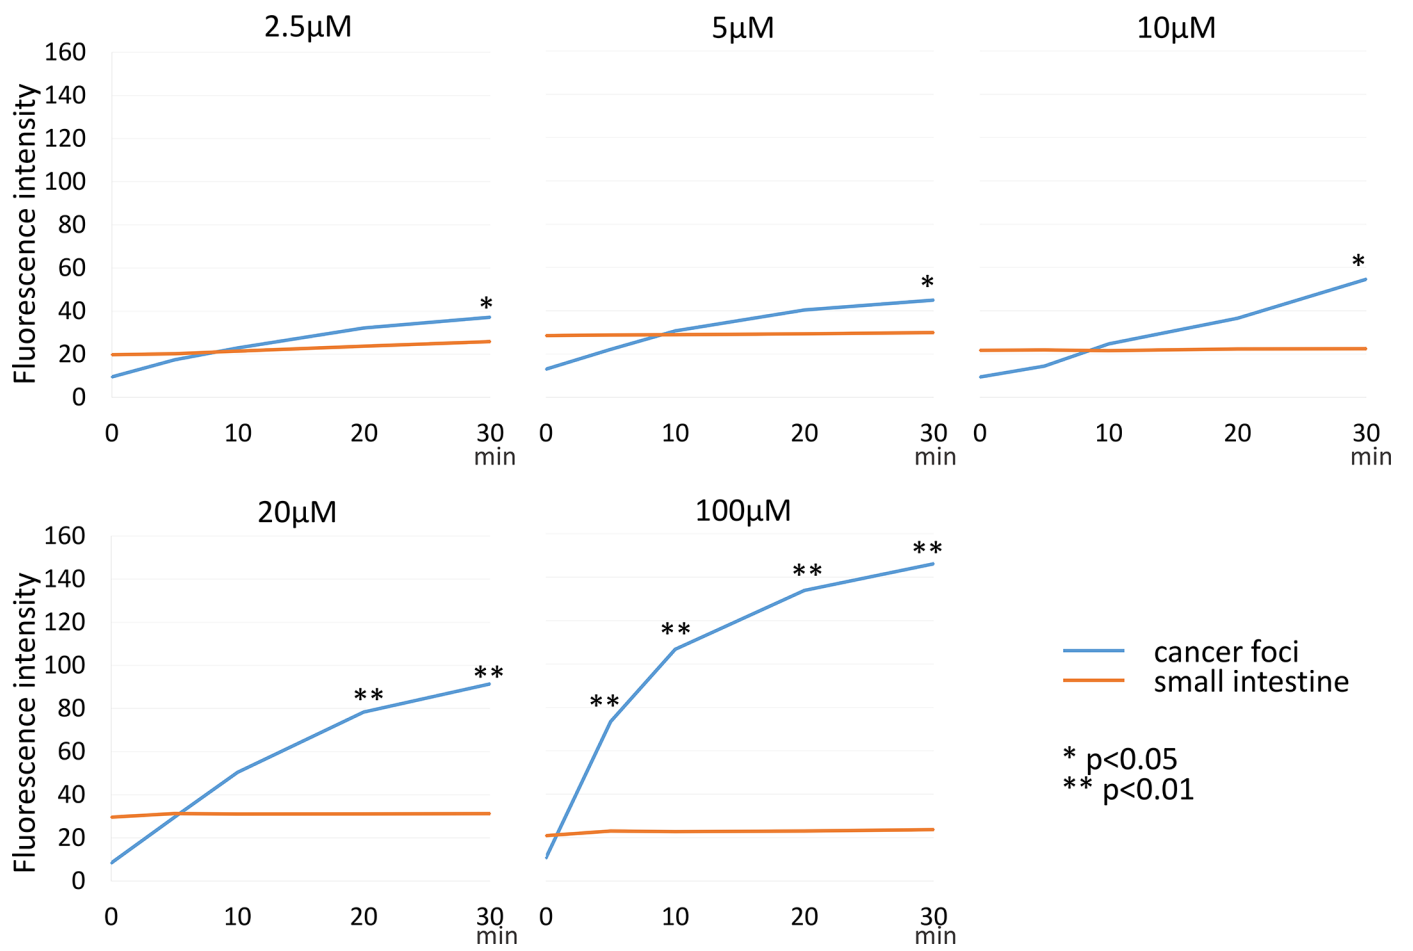

**Supplementary Figure S3: Time fluorescence intensity curve of the cancer foci and small intestine on unprocessed image.** Difference between cancer foci and small intestine was examined at each time point.

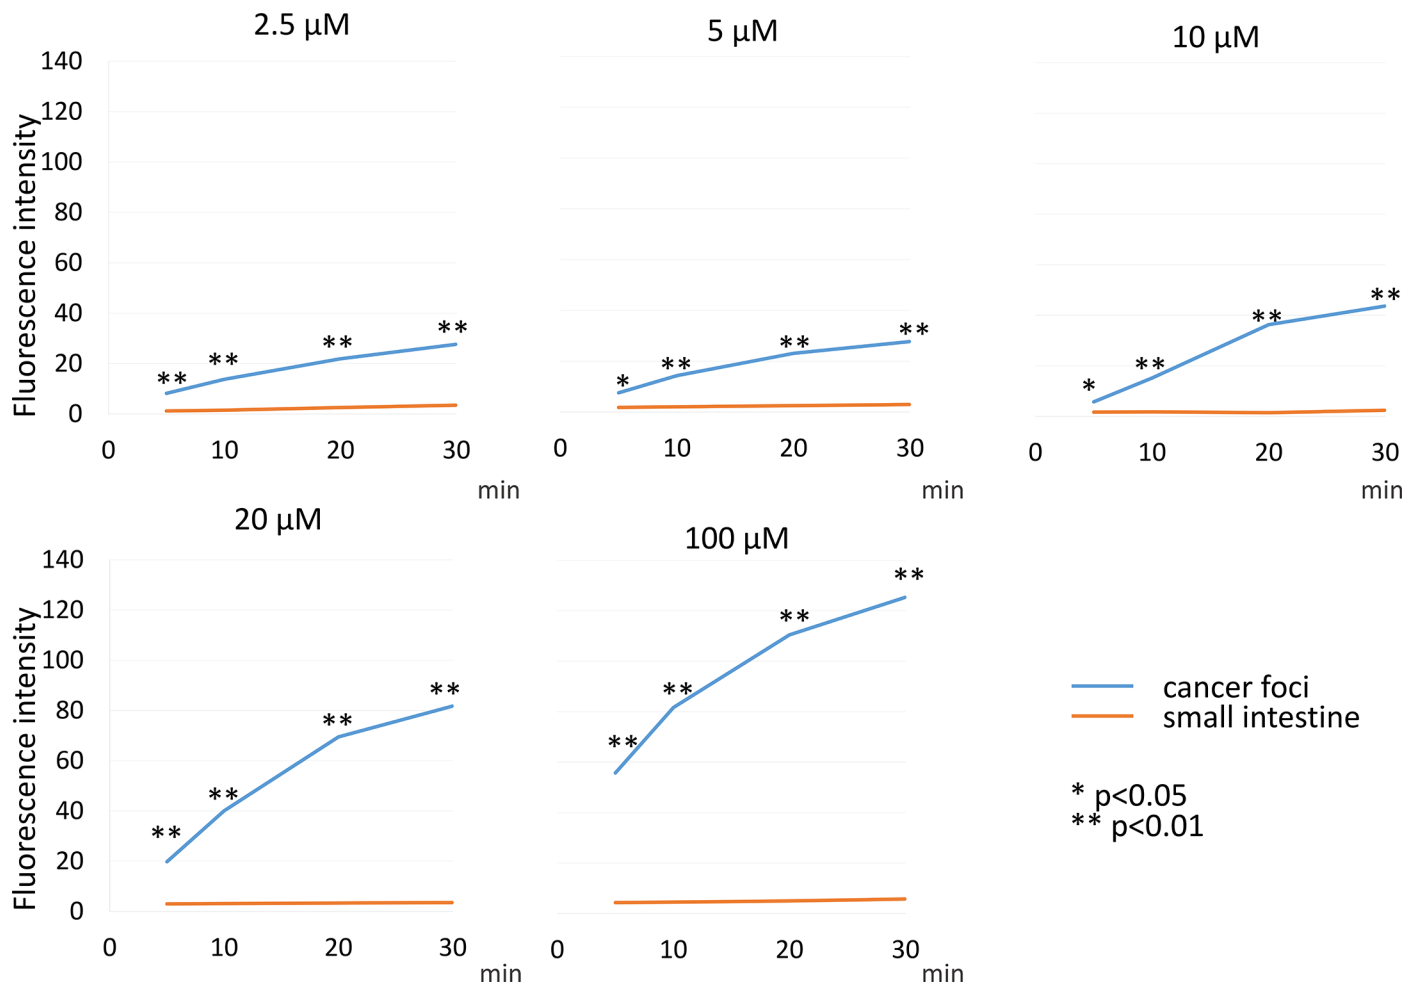

**Supplementary Figure S4: Time fluorescence intensity curve of the cancer foci and small intestine on MF maps.**  
 Difference between cancer foci and small intestine was examined at each time point.

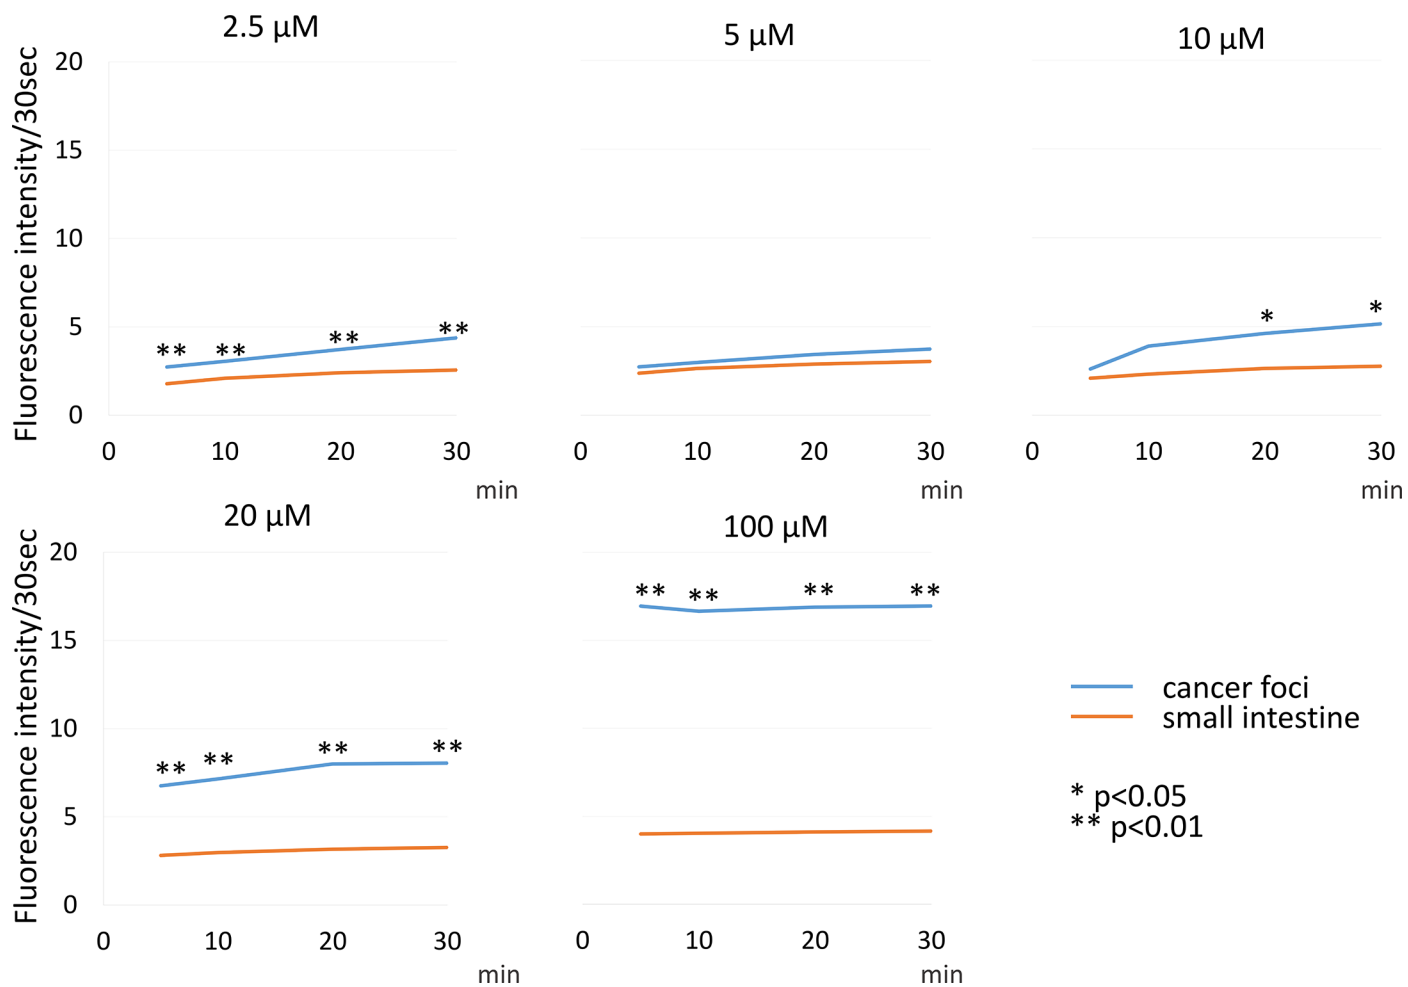

**Supplementary Figure S5: Time fluorescence intensity curve of the cancer foci and small intestine on WIR maps.**  
 Difference between cancer foci and small intestine was examined at each time point.

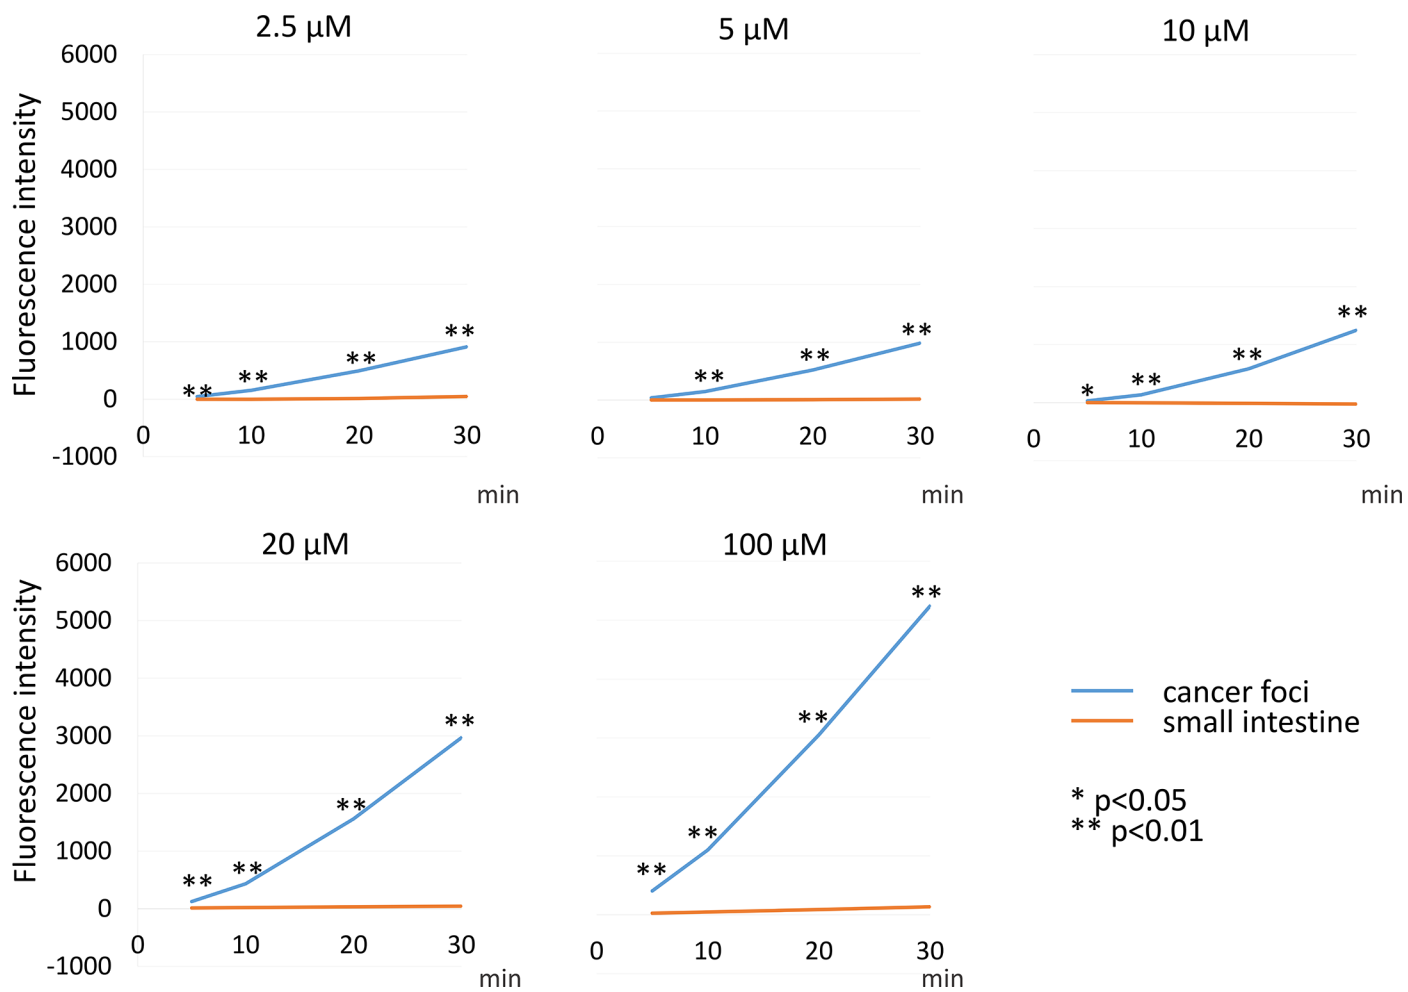

**Supplementary Figure S6: Time fluorescence intensity curve of the cancer foci and small intestine on AUC maps.** Difference between cancer foci and small intestine was examined at each time point.

**Supplementary Video S1: Movie of serial unprocessed images after spraying 2.5  $\mu\text{M}$  gGlu-HMRG.** See Supplementary\_Video\_S1

**Supplementary Video S2: Movie of serial unprocessed images after spraying 5  $\mu\text{M}$  gGlu-HMRG.** See Supplementary\_Video\_S2

**Supplementary Video S3: Movie of serial unprocessed images after spraying 10  $\mu\text{M}$  gGlu-HMRG.** See Supplementary\_Video\_S3

**Supplementary Video S4: Movie of serial unprocessed images after spraying 20  $\mu\text{M}$  gGlu-HMRG.** See Supplementary\_Video\_S4

**Supplementary Video S5: Movie of serial unprocessed images after spraying 100  $\mu\text{M}$  gGlu-HMRG.** See Supplementary\_Video\_S5
